# Supplementary material for: Axitinib Rechallenge Restores the Anticancer Effect after Nivolumab: A Case Report
Source: MDPI journal article supplement (doi:10.3390/ijms241512149), 2023-07-29
Supplement: s1 [file s1]

**Supplementary Table S1:** The laboratory findings of the case of cases

| Hemogram (202003)     |         |        |        |              |
|-----------------------|---------|--------|--------|--------------|
|                       |         | Case 1 | Case 2 | Normal range |
| WBC                   | 1000/uL | 10,3   | 4.6    | 3.9-10.6     |
| Hb                    | g/dL    | 14.8   | 15,4   | 13.5-17.5    |
| Platelets             | 1000/uL | 236    | 158    | 150-400      |
| Seg.                  | %       | 80.7   | 64.9   | 42-74        |
| Biochemistry (202003) |         |        |        |              |
|                       |         | Case 1 | Case 2 | Normal range |
| Cr.                   | mg/dL   | 1.2    | 1.0    | 0.64-1.27    |
| ALT                   | U/L     | 8      | 17     | 10-50        |
| Total Bilirubin       | mg/dL   | 0.5    | 0.8    | $\leq 1.2$   |

Abbreviation: WBC: white blood cell; Hb: hemoglobin; Seg.: Segment; Cr.: Creatine

**Supplementary Figure S1:** The clinical course of treatment with Case 1 and Case 2  
 1B: Current image of both patient 1C: The 245 pre- and post-axitinib with Case 1 and Case 2 1D: The dramatic change after axitinib rechallenge with Case 1.

A

| Line of Treatment                       | Case 1: Duration of Treatment(months) |  |  |  |  |  |  |  |  |  |  |  |
|-----------------------------------------|---------------------------------------|--|--|--|--|--|--|--|--|--|--|--|
| 1 <sup>st</sup> Pazopatinib             |                                       |  |  |  |  |  |  |  |  |  |  |  |
| 2 <sup>nd</sup> Everolimus              |                                       |  |  |  |  |  |  |  |  |  |  |  |
| 3 <sup>rd</sup> Axitinib                |                                       |  |  |  |  |  |  |  |  |  |  |  |
| 4 <sup>th</sup> Nivolumab               |                                       |  |  |  |  |  |  |  |  |  |  |  |
| 5 <sup>th</sup> Axitinib plus Nivolumab |                                       |  |  |  |  |  |  |  |  |  |  |  |
| 6 <sup>th</sup> Axitinib maintance      |                                       |  |  |  |  |  |  |  |  |  |  |  |

| Line of Treatment           | Case 2: Duration of Treatment(months) |  |  |  |  |  |  |  |  |  |  |  |
|-----------------------------|---------------------------------------|--|--|--|--|--|--|--|--|--|--|--|
| 1 <sup>st</sup> Pazopatinib |                                       |  |  |  |  |  |  |  |  |  |  |  |
|                             |                                       |  |  |  |  |  |  |  |  |  |  |  |
|                             |                                       |  |  |  |  |  |  |  |  |  |  |  |
| 2 <sup>nd</sup> Everolimus  |                                       |  |  |  |  |  |  |  |  |  |  |  |
| 3 <sup>rd</sup> Axitinib    |                                       |  |  |  |  |  |  |  |  |  |  |  |
| 4 <sup>th</sup> Nivolumab   |                                       |  |  |  |  |  |  |  |  |  |  |  |
| 5 <sup>th</sup> Axitinib    |                                       |  |  |  |  |  |  |  |  |  |  |  |

B

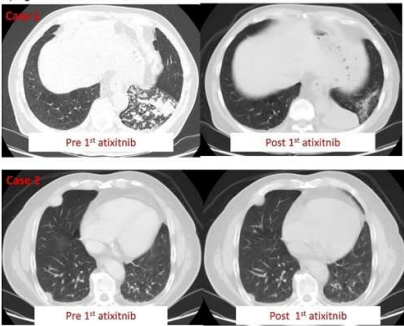

C

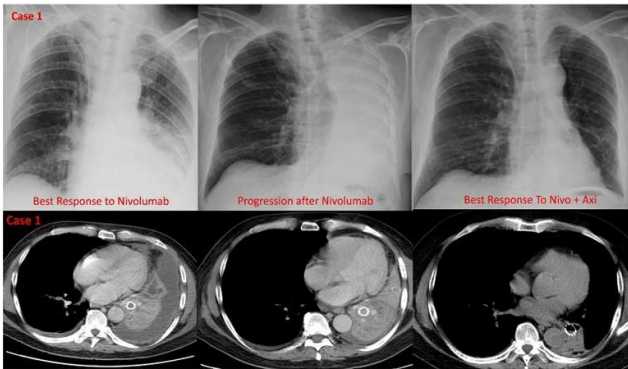

**Supplementary Figure S2:** The drug sensitivity of programmed death-ligand 1(PD-L1) in the RCC cell line. A. No association was observed between PD-L1 expression and the drug sensitivity of axitinib

A

**PD-L1 & axitinib**

| Drug     | Group      | Number | Pearson | Spearman | Slope     | Intercept | p-value (linregress) |
|----------|------------|--------|---------|----------|-----------|-----------|----------------------|
| axitinib | Expression | 6      | -0.353  | -0.2     | -6.84E-01 | 3.13E+00  | 4.93E-01             |

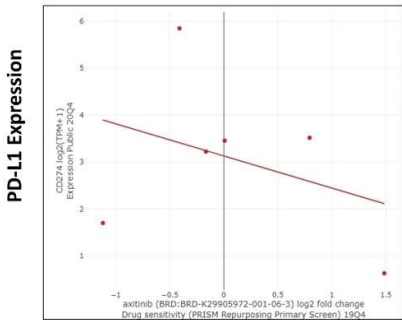

**Axitinib PRISM drug sensitivity**
